# Supplementary material for: Proton Exchange Membrane Fuel Cell Power Prediction Based on Ridge Regression and Convolutional Neural Network Data-Driven Model
Source: MDPI journal article supplement (doi:10.3390/su151411010), 2023-07-13
Supplement: s1 [file s1]

**Table S1.** VIF.

| V0      | V1    | V2    | V3     | V4    | V5     | V6      | V8   | V18   | V19     |
|---------|-------|-------|--------|-------|--------|---------|------|-------|---------|
| 109.129 | 3.251 | 2.186 | 11.129 | 3.124 | 50.228 | 129.231 | 6.58 | 45.82 | 277.723 |

**Table S2.** Prediction results.

|         | LR        | Ridge     | Lasso     | Elastic Net | KNN       | SVR       | DT        |
|---------|-----------|-----------|-----------|-------------|-----------|-----------|-----------|
| Corr    | 1.000     | 1.000     | 1.000     | 1.000       | 1.000     | 0.999     | 1.000     |
| Std     | 22.588    | 22.590    | 22.596    | 22.592      | 7.637     | 25.414    | 1.705     |
| Z       | 214       | 211       | 212       | 209         | 133       | 59        | 52        |
| CV_Mean | 512.513   | 512.463   | 512.209   | 512.463     | 226.130   | 723.481   | 21.587    |
| CV_Std  | 26.754    | 26.672    | 26.281    | 22.917      | 73.213    | 26.741    | 9.070     |
| Score   | 0.9992208 | 0.9992207 | 0.9992203 | 0.9992205   | 0.9999109 | 0.9990136 | 0.9999956 |

**Table S3.** Prediction results.

|         | RF        | GBR       | XGB       | AdaBoost  |
|---------|-----------|-----------|-----------|-----------|
| Corr    | 1.000     | 1.000     | 1.000     | 1.000     |
| Std     | 1.183     | 0.532     | 0.063     | 0.055     |
| Z       | 54        | 21        | 98        | 113       |
| CV_Mean | 11.730    | 14.627    | 10.565    | 11.636    |
| CV_Std  | 5.054     | 7.733     | 4.546     | 7.395     |
| Score   | 0.9999979 | 0.9999996 | 1.0000000 | 1.0000000 |

**Table S4.** Main parameters of the ML model.

| LR          | Ridge                           | Lasso                             | Elastic Net                                          | KNN             | SVR                        | DT                                                                                                                    |
|-------------|---------------------------------|-----------------------------------|------------------------------------------------------|-----------------|----------------------------|-----------------------------------------------------------------------------------------------------------------------|
| n_jobs = 16 | alpha = 0.25,<br>max_iter = 500 | alpha = 0.0081,<br>max_iter = 500 | alpha = 0.0003,<br>l1_ratio = 0.9,<br>max_iter = 500 | n_neighbors = 3 | C = 1.9,<br>max_iter = 500 | max_depth = 16,<br>max_features = 8,<br>min_samples_split = 3,<br>min_samples_leaf = 2,<br>min_impurity_split = 1e-06 |

**Table S5.** Main parameters of the EL model.

| RF                                                                                                                         | GBR                                                                                                                                                                                                                        | XGB                                                                                                                                                                                                                                                                                                                      | AdaBoost                                                                                                  |
|----------------------------------------------------------------------------------------------------------------------------|----------------------------------------------------------------------------------------------------------------------------------------------------------------------------------------------------------------------------|--------------------------------------------------------------------------------------------------------------------------------------------------------------------------------------------------------------------------------------------------------------------------------------------------------------------------|-----------------------------------------------------------------------------------------------------------|
| n_estimators = 1000,<br>max_features = 8,<br>min_samples_leaf = 1,<br>min_samples_split = 2,<br>min_impurity_split = 1e-07 | n_estimators = 1500,<br>learning_rate = 0.4,<br>max_depth = 6,<br>max_features = 10,<br>min_samples_split = 2,<br>min_samples_leaf = 2,<br>loss = 'huber',<br>alpha = 0.99,<br>min_impurity_split = 1e-3,<br>subsample = 1 | booster = 'gbtree',<br>n_estimators = 1500,<br>learning_rate = 0.1,<br>max_depth = 10,<br>min_child_weight = 1,<br>colsample_bytree = 1,<br>gamma = 0.002,<br>reg_alpha = 0,<br>reg_lambda = 1,<br>subsample = 0.9,<br>colsample_bynode = 1,<br>scale_pos_weight = 1,<br>num_parallel_tree = 1,<br>colsample_bylevel = 1 | base_estimator = DecisionTreeRegressor (),<br>loss = liner,<br>n_estimators = 100,<br>learning_rate = 0.1 |

**Table S6.** Main parameters of the DL model.

| FFN                    | CNN                          |
|------------------------|------------------------------|
| learning_rate = 0.006, | batch_size = 256,            |
| batch_size = 64,       | learning_rate1 = 0.001,      |
| input_number = 10,     | epochs1 = 1200,              |
| hidden1_number = 256,  | weight_decay1 = 0.000000001, |
| hidden2_number = 128,  | learning_rate2 = 0.0006,     |
| hidden3_number = 32,   | epochs2 = 1200,              |
| out_number = 1,        | weight_decay2 = 0.000000001, |
| epochs = 2000          | learning_rate3 = 0.00006,    |
|                        | epochs3 = 1500,              |
|                        | weight_decay3 = 0.000000001  |

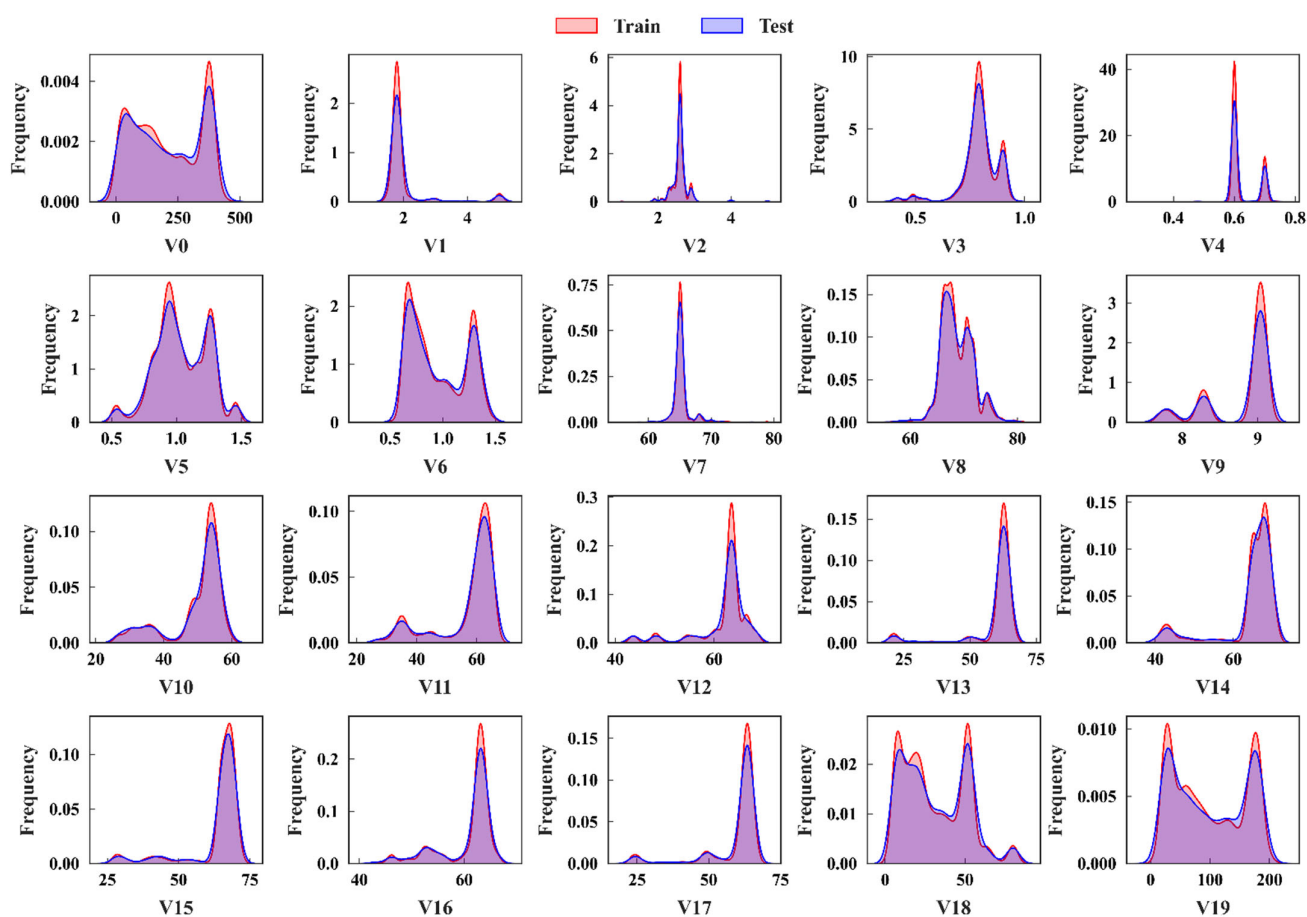

**Figure S1.** KDE distribution map.

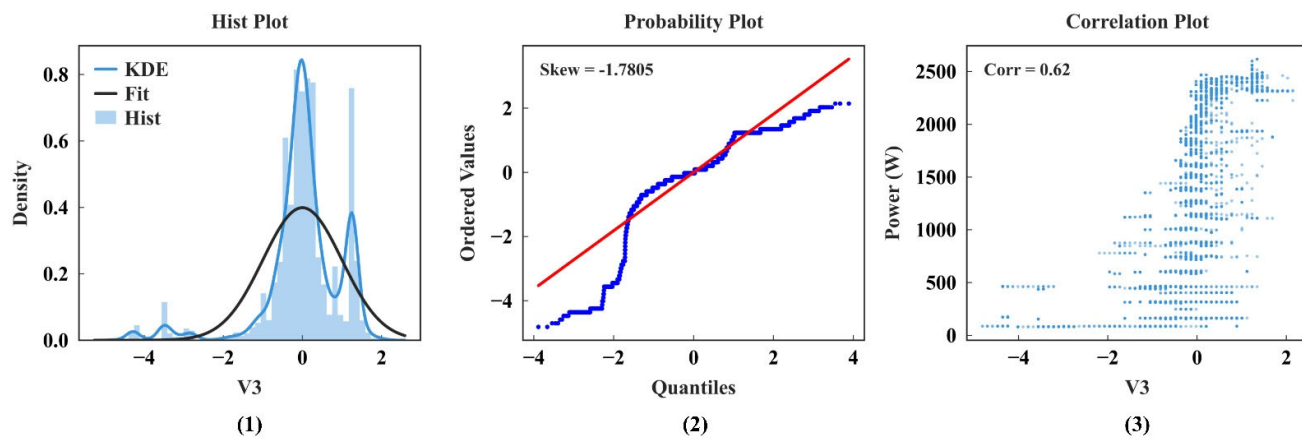

(a) Before the Yeo-Johnson transformation

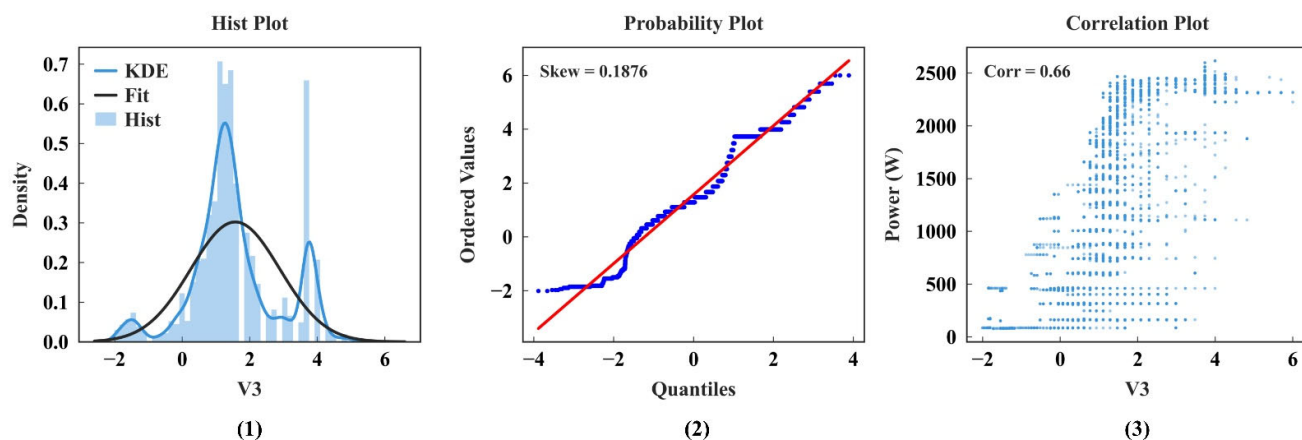

(b) After the Yeo-Johnson transformation

**Figure S2.** Yeo-Johnson transformation.

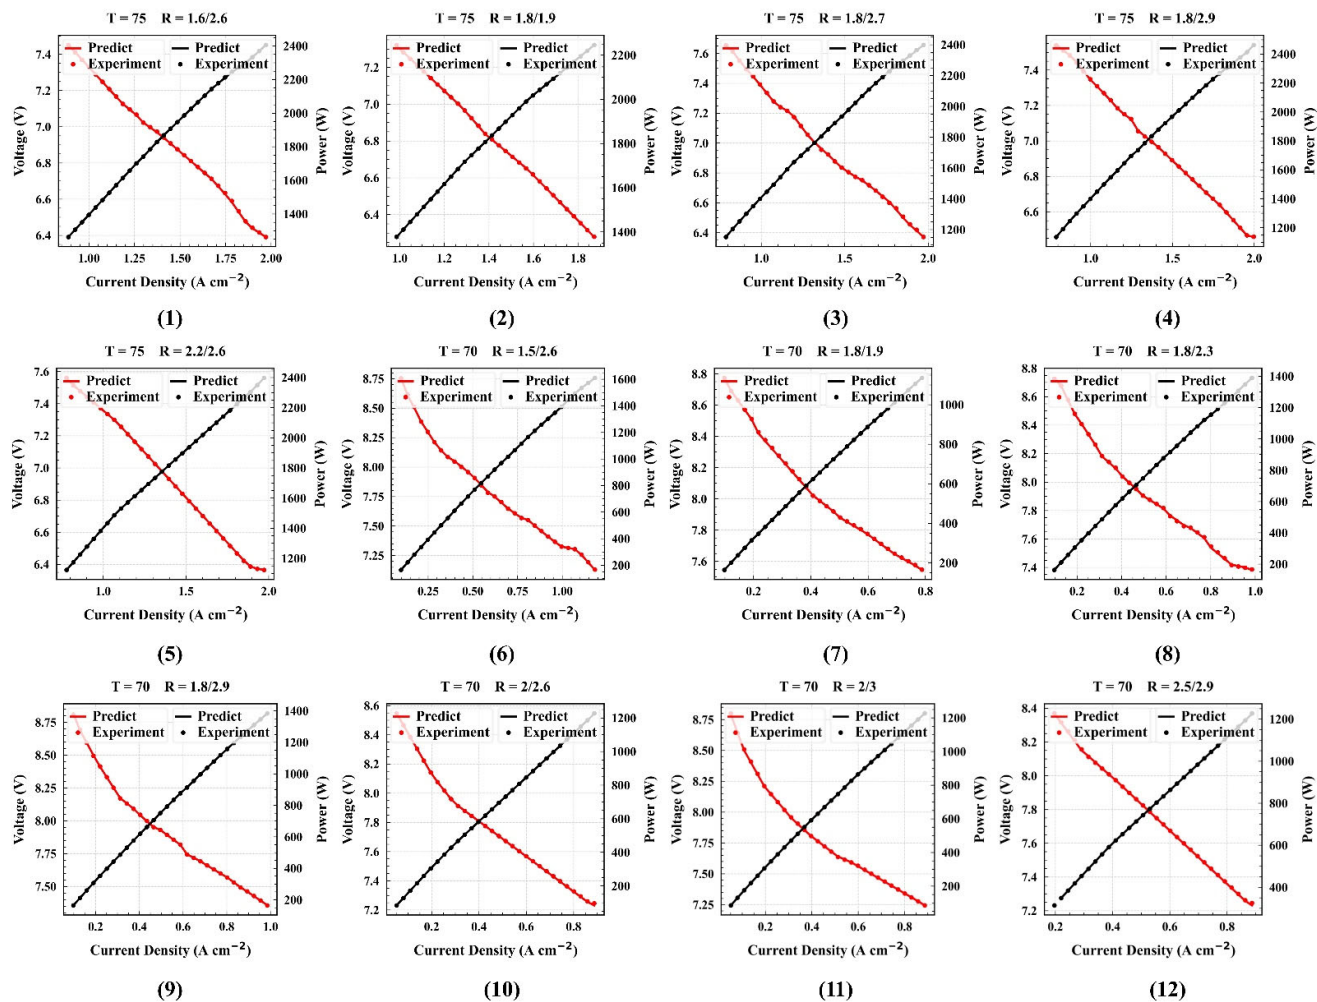

Figure S3. Polarization curves.
